# Supplementary material for: Monitoring the Modern Experience of Financial Risk Management in Russia Based on Corporate Social Responsibility for Sustainable Development
Source: MDPI journal article supplement (doi:10.3390/risks10050092), 2022-04-21
Supplement: s1 [file s1]

**Table S1.** Sample of Russian companies in the extraction industry and the directions of their CSR in 2020.

| Position in the Ranking of Forbes | Company                     | Sub-Sector | Specialisation                | Index "Responsibility and Openness" | Index "Vector of Sustainable Development" |
|-----------------------------------|-----------------------------|------------|-------------------------------|-------------------------------------|-------------------------------------------|
| 32                                | Gazprom                     | Energy     | Oil and Gas Operations        | 14.83                               | 4.84                                      |
| 53                                | Rosneft                     | Energy     | Oil and Gas Operations        | 4.59                                | 3.88                                      |
| 99                                | Lukoil                      | Energy     | Oil and Gas Operations        | 16.81                               | 3.52                                      |
| 316                               | Novatek                     | Energy     | Oil and Gas Operations        | 7.15                                | 3.5                                       |
| 405                               | Transneft                   | Energy     | Oil Services and Equipment    | 0.61                                | 2.83                                      |
| 539                               | Tatneft                     | Energy     | Oil and Gas Operations        | 2.41                                | 3.42                                      |
| 970                               | Novolipetsk Steel           | Materials  | Iron and Steel                | 7.15                                | 3.5                                       |
| 1021                              | Polyus                      | Materials  | Diversified Metals and Mining | 2.5                                 | 3.33                                      |
| 1536                              | Magnitogorsk Iron and Steel | Materials  | Iron and Steel                | 2.49                                | 3.12                                      |
| 1750                              | Alrosa                      | Materials  | Diversified Metals and Mining | 2.01                                | 3.93                                      |
| 1843                              | Polymetal International     | Materials  | Diversified Metals and Mining | 2.73                                | 3.48                                      |

Source: compiled by the authors based on the material in Forbes (2021).

**Table S2.** Financial results of Russian companies in 2020.

| Company                     | Sales | Profits | Assets | Market Value |
|-----------------------------|-------|---------|--------|--------------|
| Gazprom                     | 122.6 | 22.7    | 331.7  | 60.8         |
| Rosneft                     | 126.9 | 10.9    | 208.5  | 48.1         |
| Lukoil                      | 116.3 | 9.9     | 95.7   | 41.2         |
| Novatek                     | 13.2  | 13.4    | 32.5   | 42.6         |
| Transneft                   | 16.4  | 2.8     | 54.3   | 13.4         |
| Tatneft                     | 14.8  | 3       | 19.9   | 16.7         |
| Novolipetsk Steel           | 10.1  | 1.2     | 9.7    | 10.4         |
| Polyus                      | 4     | 1.9     | 8.3    | 21.8         |
| Magnitogorsk Iron and Steel | 7.4   | 0.756   | 8.4    | 6.1          |
| Alrosa                      | 3.6   | 0.958   | 6.9    | 6.2          |
| Polymetal International     | 2.2   | 0.482   | 4.2    | 9.7          |

Source: compiled by the authors based on the material in Forbes (2021).

**Table S3.** Financial results of Russian companies in 2019.

| Company | Sales  | Profits | Assets  | Market Value |
|---------|--------|---------|---------|--------------|
| Gazprom | 59.861 | 128.43  | 18.916  | 305.935      |
| Rosneft | 72.161 | 937.8   | 739.191 | 272.52       |
| Lukoil  | 61.103 | 127.914 | 856.82  | 632.97       |

|                             |        |        |       |         |
|-----------------------------|--------|--------|-------|---------|
| Novatek                     | 52.684 | 13.175 | 2.606 | 534.5   |
| Transneft                   | 19.267 | 15.599 | 3.571 | 45.98   |
| Tatneft                     | 27.238 | 14.876 | 3.372 | 316.524 |
| Novolipetsk Steel           | 16.229 | 12.062 | 2.242 | 9.944   |
| Polyus                      | n/a    | n/a    | n/a   | n/a     |
| Magnitogorsk Iron and Steel | 7.723  | 8.203  | 1.316 | 7.249   |
| Alrosa                      | 11.027 | 4.743  | 1.425 | 5.927   |
| Polymetal International     | n/a    | n/a    | n/a   | n/a     |

Source: compiled by the authors based on the material in Forbes (2021).

**Table S4.** Financial results of Russian companies in 2021.

| <b>Company</b>              | <b>Sales</b> | <b>Profits</b> | <b>Assets</b> | <b>Market Value</b> |
|-----------------------------|--------------|----------------|---------------|---------------------|
| Gazprom                     | 90.5         | -921.2         | 294.9         | 73.5                |
| Rosneft                     | 70.8         | 2              | 207.5         | 77.7                |
| Lukoil                      | 71.8         | 209.7          | 81.5          | 52.3                |
| Novatek                     | 9.6          | 0.937          | 27.9          | 58.4                |
| Transneft                   | 14.3         | 2.1            | 44.1          | 13.9                |
| Tatneft                     | 10.2         | 1.4            | 17.1          | 17.3                |
| Novolipetsk Steel           | 9.2          | 1.3            | 9.9           | 20.9                |
| Polyus                      | 5            | 1.6            | 7.3           | 26.7                |
| Magnitogorsk Iron and Steel | 6.4          | 0.611          | 7.6           | 10.1                |
| Alrosa                      | n/a          | n/a            | n/a           | n/a                 |
| Polymetal International     | n/a          | n/a            | n/a           | n/a                 |

Source: compiled by the authors based on the material in Forbes (2021).
